# Supplementary material for: Donation type and the effect of pre-transplant donor specific antibodies – Data from the Swiss Transplant Cohort Study
Source: PubMed Central journal article supplement (PMC9974644; doi:10.3389/fimmu.2023.1104371), 2023-02-15

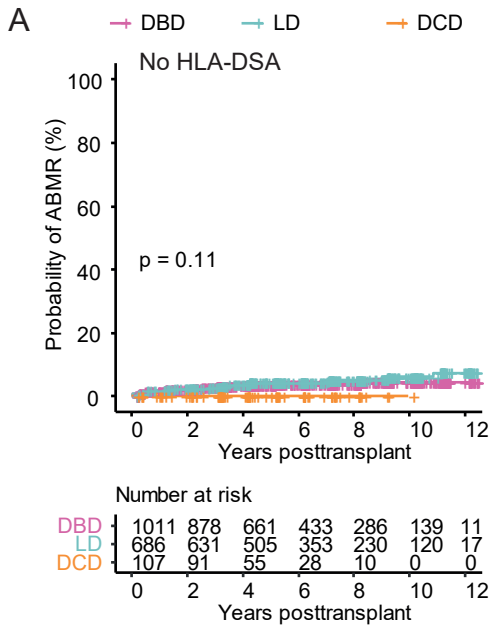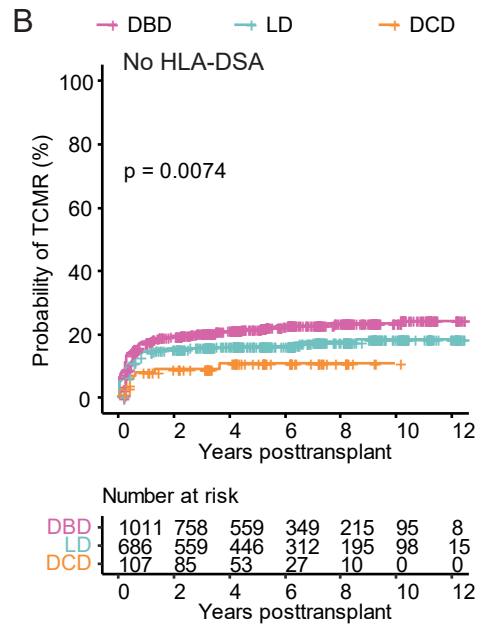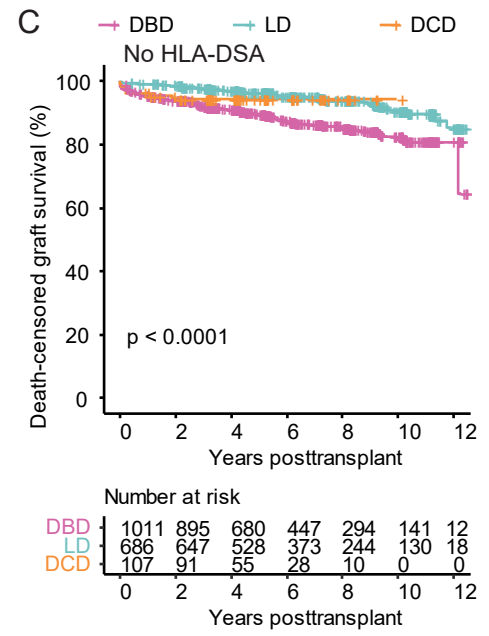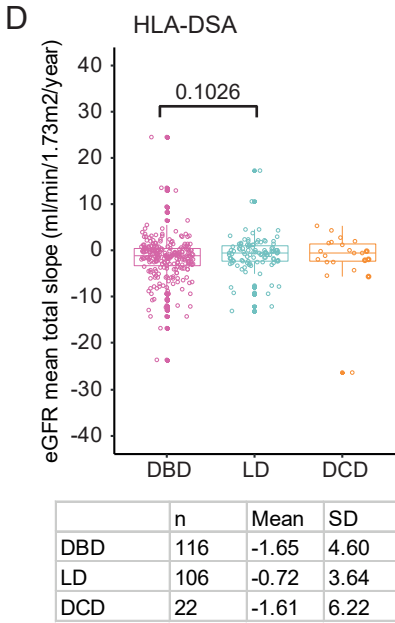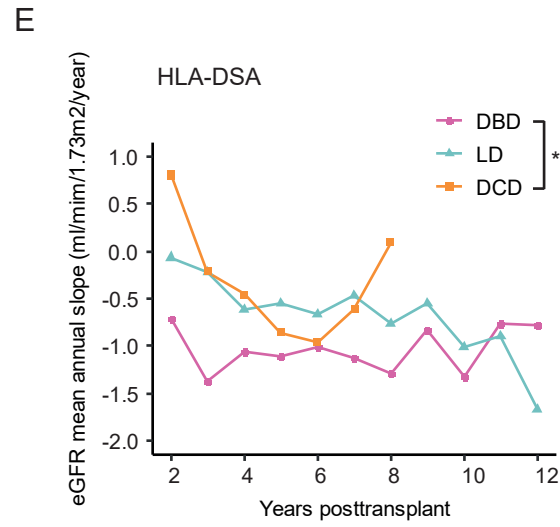

Supplement: Image_3.pdf [file Image_3.pdf]
