# Supplementary material for: Donation type and the effect of pre-transplant donor specific antibodies – Data from the Swiss Transplant Cohort Study
Source: PubMed Central journal article supplement (PMC9974644; doi:10.3389/fimmu.2023.1104371), 2023-02-15
Supplement: Image_6.pdf [file Image_6.pdf]

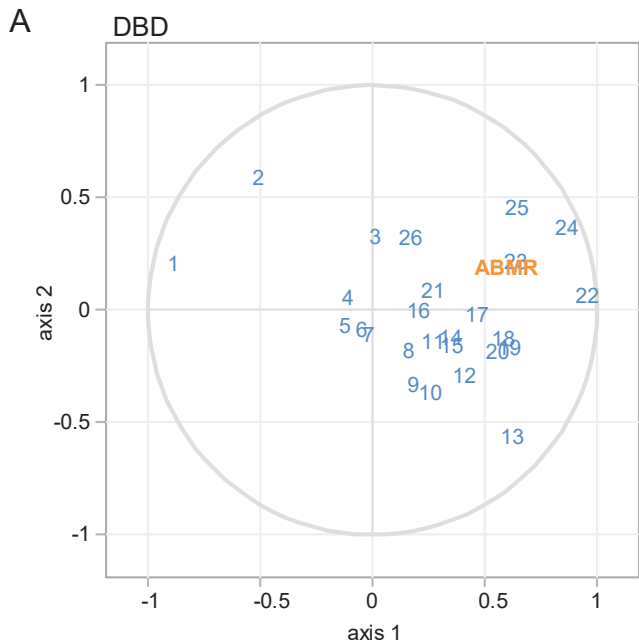

- |                |                     |               |
|----------------|---------------------|---------------|
| 1-No DSA       | 10-MFI<1K           | 19-DSA_II     |
| 2-Basiliximab  | 11-DSA DR           | 20-MFI 1-5k   |
| 3-TCMR         | 12-DSA_I            | 21-DSA DP     |
| 4-Sex          | 13-ATG/Thymo+/-IvIg | 22-DSAcount   |
| 5-Age          | 14-BITransfusion    | 23-DSA_I+II   |
| 6-No induction | 15-DSA DQ           | 24-CumMFI     |
| 7-ColdIschemia | 16-DSA C            | 25-MFI>10k    |
| 8-DSA B        | 17-MFI 5-10k        | 26-eGFR slope |
| 9-DSA A        | 18-OrganTx          |               |

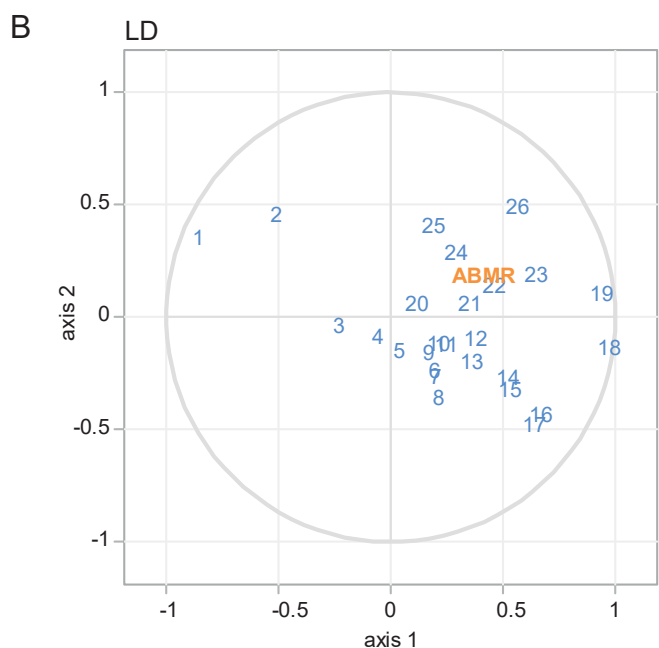

- |                |                     |                 |
|----------------|---------------------|-----------------|
| 1-No DSA       | 10-BITransfusion    | 19-CumMFI       |
| 2-Basiliximab  | 11-DSA C            | 20-eGFR slope   |
| 3-Sex          | 12-DSA A            | 21-DSA DQ       |
| 4-No induction | 13-MFI<1K           | 22-MFI>10k      |
| 5-Age          | 14-DSA_I            | 23-DSA_I+II     |
| 6-DSA DP       | 15-DSA_II           | 24-ColdIschemia |
| 7-DSA B        | 16-ATG/Thymo+/-IvIg | 25-TCMR         |
| 8-DSA DR       | 17-MFI 1-5k         | 26-MFI 5-10k    |
| 9-OrganTx      | 18-DSAcount         |                 |

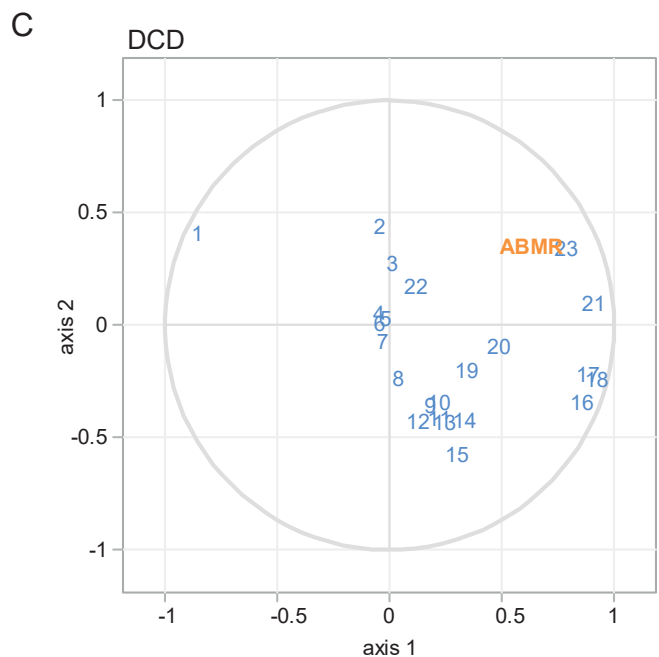

- |                |                     |                  |
|----------------|---------------------|------------------|
| 1-No DSA       | 10-MFI 5-10k        | 19-BITransfusion |
| 2-Basiliximab  | 11-DSA_I            | 20-OrganTx       |
| 3-Age          | 12-ATG/Thymo+/-IvIg | 21-MFI 1-5k      |
| 4-TCMR         | 13-DSA DR           | 22-eGFR slope    |
| 5-No induction | 14-DSA DP           | 23-DSA DQ        |
| 6-Sex          | 15-MFI<1K           |                  |
| 7-ColdIschemia | 16-DSAcount         |                  |
| 8-DSA C        | 17-CumMFI           |                  |
| 9-DSA A        | 18-DSA_II           |                  |
