# Supplementary material for: Donation type and the effect of pre-transplant donor specific antibodies – Data from the Swiss Transplant Cohort Study
Source: PubMed Central journal article supplement (PMC9974644; doi:10.3389/fimmu.2023.1104371), 2023-02-15
Supplement: Table_1.pdf [file Table_1.pdf]

**Supplementary Table 1.** Characteristics of the recipient transplanted with kidney from different donor types

| Parameter                                 | DBD total patients<br>(n=1282) | LD total patients<br>(n=803) | DCD total patients<br>(n=130) | p value (DBD<br>vs. LD) | p value (DBD<br>vs. DCD) | p value (LD<br>vs. DCD) | p value (DBD<br>vs. LD vs. DCD) |
|-------------------------------------------|--------------------------------|------------------------------|-------------------------------|-------------------------|--------------------------|-------------------------|---------------------------------|
| Recipient age (mean value)                | 54.80                          | 49.15                        | 53.15                         | <0.001                  | 0.932                    | 0.03                    | <0.001                          |
| Recipient (female) gender                 | 38%                            | 34%                          | 41%                           | <0.001                  | 0.011                    | 0.196                   | 0.137                           |
| Donor age (mean value)                    | 51.53                          | 53.70                        | 50.88                         | <0.001                  | <0.001                   | 0.004                   | 0.008                           |
| Donor (female) gender                     | 44%                            | 53%                          | 38%                           | <0.001                  | <0.001                   | 0.504                   | <0.001                          |
| Mean follow-up time (year)                | 5.81                           | 6.47                         | 4.34                          | 0.557                   | <0.001                   | <0.001                  | <0.001                          |
| Cold ischemia time (DD)/h<br>(mean value) | 8.59                           | 4.76                         | 7.00                          | 0.742                   | 0.555                    | 0.464                   | <0.001                          |
| HLA mismatches                            |                                |                              |                               |                         |                          |                         |                                 |
| HLA A (yes)                               | 14%                            | 18%                          | 7%                            | <0.001                  | <0.001                   | <0.001                  | 0.003                           |
| HLA B (yes)                               | 7%                             | 13%                          | 5%                            | <0.001                  | 0.091                    | <0.001                  | <0.001                          |
| HLA DRB1 (yes)                            | 16%                            | 17%                          | 14%                           | 0.458                   | 0.094                    | 0.175                   | 0.710                           |
| Induction therapy (yes)                   | 98%                            | 97%                          | 100%                          | 0.012                   | <0.001                   | <0.001                  | 0.067                           |
